# Supplementary material
Source: PubMed Central journal article supplement (PMC1838474)

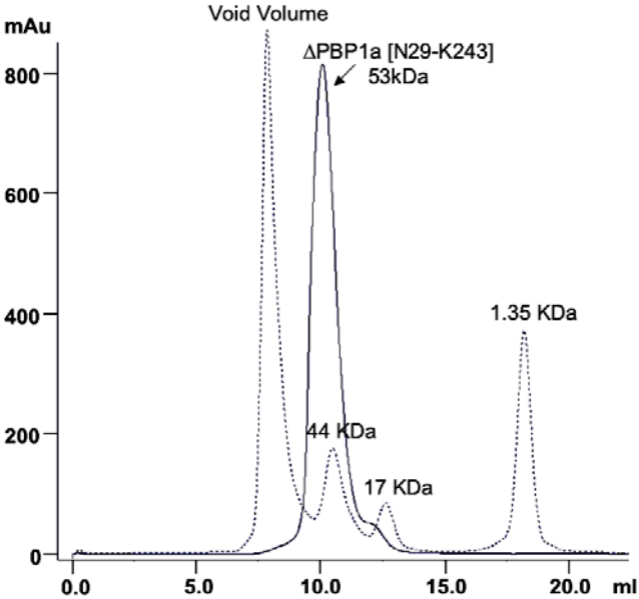

Supplement: pnas_0701160104_1.pdf [file pnas_0701160104_1.pdf]

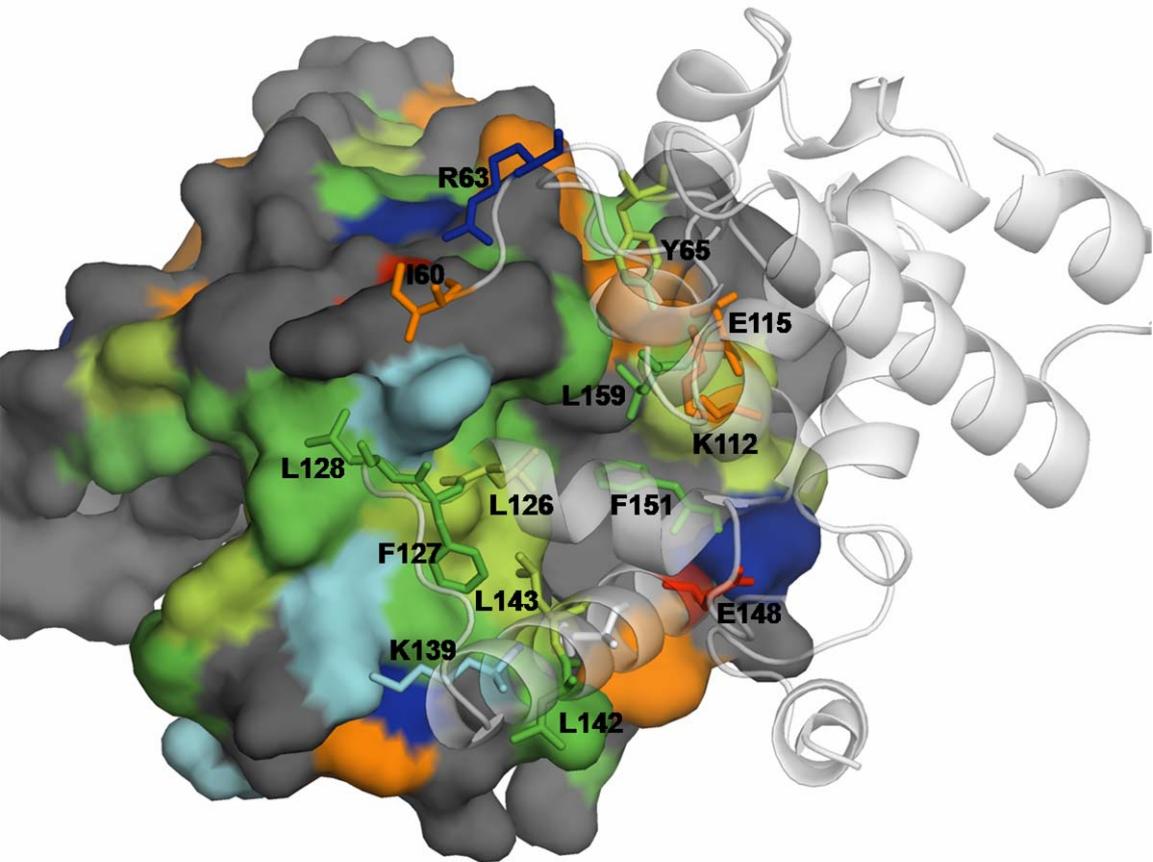

Supplement: pnas_0701160104_2.pdf [file pnas_0701160104_2.pdf]
